# Supplementary material
Source: publisher figshare collection journal article supplement (https://acs.figshare.com/ndownloader/files/9570253)
Supplement: Supplementary file 1 [file 9570253]

# Chemisorption-Induced Activation of $\text{MgCl}_2$ Film as Realistic Route for Heterogeneous Ziegler-Natta Surfaces under Ultrahigh Vacuum

*Toshiaki Taniike<sup>1,2\*</sup>, Patchanee Chammingkwan<sup>1,2</sup>, Vu Q. Thang<sup>1</sup>, Keisuke Goto<sup>1</sup>, Tadahiro Fujitani<sup>3</sup> and Minoru Terano<sup>1,2</sup>*

<sup>1</sup> Graduate School of Advanced Science and Technology, Japan Advanced Institute of Science and Technology, 1-1 Asahidai, Nomi, Ishikawa, 923-1292 Japan

<sup>2</sup> Dutch Polymer Institute (DPI), P.O. Box 902, 5600AX Eindhoven, The Netherlands

<sup>3</sup> Research Institute for Innovation in Sustainable Chemistry, National Institute of Advanced Industrial Science and Technology, 16-1 Onogawa, Tsukuba, Ibaraki, 305-8569 Japan

## Calculation of pyridine adsorption energy

The adsorption energy was calculated based on the numerical details reported in Taniike, T.; Terano, M. Coadsorption and Support-Mediated Interaction of Ti Species with Ethyl Benzoate in  $\text{MgCl}_2$ -Supported Heterogeneous Ziegler-Natta Catalysts Studied by Density Functional Calculations, *Macromol. Rapid Commun.* **2007**, 28, 1918–1922:

The exchange-correlation functional of Perdew, Burke and Ernzerhof, and the basis set of DNP with effective core potentials were employed within the program of DMOL3. The  $\text{MgCl}_2$  bulk was assumed to have the  $\alpha$  crystalline phase with their lattice constants fixed at the experimental values of 0.3636 and 1.7666 nm. The  $\text{MgCl}_2$  (110) and (100) surfaces were expressed as a repeated slab, where the vacuum layer of  $15\text{\AA}$  was taken. The thicknesses of the slabs for the (110) and (100) surfaces were, respectively, set to 6 and 14 atomic layers owing to the balanced performance in accuracy and computational feasibility. For the adsorption of pyridine, a  $p(2\times 2)$  unit cell having 24  $\text{MgCl}_2$  was used for the (110) surface and a  $p(3\times 1)$  unit cell having 36  $\text{MgCl}_2$  was used for the (100) surface. The  $1\times 1\times 1$  and  $2\times 1\times 1$   $k$  points were, respectively, applied to the  $p(2\times 2)$  (110) and  $p(3\times 1)$  (100) surfaces, ensuring the converged adsorption energies. All the atoms were permitted to relax except the bottom two layers of the supports. The convergence criterion for SCF calculations was  $1.0\times 10^{-5}$  Hartree, and those for the geometry optimization were  $2.0\times 10^{-5}$  Hartree for energy and  $2.1\times 10^{-3}$  Hartree/Bohr for the maximum force.

According to the above computational details, the adsorption energy of pyridine was derived as  $-29.2$  and  $-28.8$  kcal/mol on the (110) and (100) surfaces, respectively.
